# Supplementary material for: Notch-regulated miR-223 targets the aryl hydrocarbon receptor pathway and increases cytokine production in macrophages from rheumatoid arthritis patients
Source: PubMed Central journal article supplement (PMC4738320; doi:10.1038/srep20223), 2016-02-03
Supplement: srep20223-s1.pdf [file srep20223-s1.pdf]

**Notch-regulated miR-223 targets the aryl hydrocarbon receptor pathway and increases cytokine production in macrophages from rheumatoid arthritis patients**

Jesús Ogando, Manuel Tardáguila, Andrea Díaz-Alderete, Alicia Usategui, Vanessa Miranda-Ramos, Dannys Jorge Martínez-Herrera, Lorena de la Fuente María J. García-León, María C. Moreno, Sara Escudero, Juan D. Cañete, María L. Toribio, Ildefonso Cases, Alberto Pascual-Montano, José Luis Pablos, Santos Mañes

The following supplementary material may be found in the online version of this article:

**Table S1. Transcription factors predicted to bind to the miR-223 promoter**

**Table S2. Most probable sites predicted for hsa-miR-223-3p and hsa-miR-223-5p on the human *arnt* gene**

**Table S3. Clinical characteristics of RA patients**

**Table S4. List of primers used in the study**

**Figure S1. Non-validated miR expressed in RA and OA patient macrophages**

**Figure S2. Notch1 and Notch2 are not differentially expressed in RA and OA macrophages**

**Figure S3. IKK $\alpha$  is not differentially expressed in RA and OA macrophages**

**Figure S4. Ingenuity Pathway Analysis of miR-223 targets identified in silico**

**Figure S5. Forced miR-223 expression does not affect AHR protein levels**

**Figure S6. AHR target gene expression in synovial macrophages**

**Figure S7. Correlation between CYP1A1, miR-223 and Notch3 levels**

**Table S1. Transcription factors predicted to bind to the miR-223 promoter**

| Transcription factor | Location          | Cell type |
|----------------------|-------------------|-----------|
| SRF                  | 66017174-66017482 | GM12878   |
| PU1                  | 66018575-66019006 | GM12878   |
| EGR1                 | 66009236-66009546 | K562      |
| TAF1                 | 66015066-66015773 | K562      |
| HEY-1                | 66015169-66019731 | K562      |
| PU1                  | 66018574-66018961 | K562      |

**Table S2. Most probable sites predicted for hsa-miR-223-3p and hsa-miR-223-5p on the human *arnt* gene**

| miRNA          | Ensembl transcript ID | Seedmatch details<br>(length/# wobbles/first nt) | Position in 3'-UTR | Prediction<br>algorithm |
|----------------|-----------------------|--------------------------------------------------|--------------------|-------------------------|
| hsa-miR-223-3p | ENST00000354396       | 6mer/0/3                                         | 1141-1146          | FindTar                 |
|                | ENST00000358595       |                                                  | 1526-1531          |                         |
|                | ENST00000471844       |                                                  | 79-84              |                         |
|                | ENST00000504358       | 6mer/1/3                                         | 243-248            |                         |
| hsa-miR-223-5p | ENST00000354396       | 7mer/1/2                                         | 761-767            |                         |
|                | ENST00000358595       |                                                  | 1146-1152          |                         |
|                | ENST00000471844       |                                                  | 778-785            |                         |
|                | ENST00000354396       | 8mer/1/3                                         | 1163-1170          |                         |
|                | ENST00000358595       |                                                  | 2096-2101          |                         |
|                | ENST00000471844       |                                                  | 6mer/1/1           |                         |

Site position is counted from the beginning of the 3'UTR. Sites conserved in different 3'UTRs were obtained by a multiple sequence alignment using ClustalW v2.1.

**Table S3. Clinical characteristics of RA patients**

| <b>Characteristic</b>         | <b>number (% or SD)</b> |
|-------------------------------|-------------------------|
| Female                        | 8 (73)                  |
| Age (SD)                      | 63 (5)                  |
| Time of evolution, years (SD) | 11 (8)                  |
| EROSIONS                      | 8 (73)                  |
| RF+                           | 7 (63)                  |
| ACPA+                         | 8 (73)                  |
| Prednisone                    | 4 (36)                  |
| DMARDs                        | 5 (45)*                 |

RF, Rheumatoid factor; ACPA, anti-citrullinated peptide antigen; DMARD, Disease modifying anti-rheumatic drugs; (\*) 4 Methotrexate, 1 anti-malarials. No patients were on biologic therapy.

**Table S4. List of primers used in the study**

| <b>Gene</b>                   | <b>Forward</b>           | <b>Reverse</b>         |
|-------------------------------|--------------------------|------------------------|
| <i>b-act</i>                  | CCCAGCACAATGAAGATCAA     | CCCAGCACAATGAAGATCAA   |
| <i>ikka</i>                   | TGTGCCTCTTCTAGCAATGGA    | TTCTGGTTTGTGAGCAGCTT   |
| <i>hey1</i>                   | CGAGCTGGACGAGACCAT       | CTAGAGCCGAACTCAAGTTTCC |
| <i>hes1</i>                   | GTGAAGCACCTCCGGAAC       | GTCACCTCGTTCATGCACTC   |
| <i>cyp1a1</i>                 | CCCAGGCTCCAAGAGTCCACCC   | GCCAGAAGAACTCCGTGGCCG  |
| <i>cyp1b1</i>                 | ACATCTTCGGCGCCAGCCAGG    | TCCCTCCCCACGACCTGATCCA |
| <i>il-6</i>                   | CGGGAACGAAAGAGAAGCTCTA   | GGCGCTTGTGGAGAAGGAG    |
| <i>il-1<math>\beta</math></i> | CCCTAAACAGATGAAGTGCTCCTT | GTAGCTGGATGCCGCCAT     |
| <i>notch1</i>                 | TACAAGTGCAACTGCCTGCT     | GGCAGACACAGGAGAAGCTC   |
| <i>notch2</i>                 | TCAGCCGGGATACCTATGAG     | TTTGCACAGGGATGAGACAG   |
| <i>notch3</i>                 | CGTGGCTTCTTTCTACTGTGC    | CGTTCACCGGATTTGTGTC    |
| <i>jag1</i>                   | GTCCTAAGCATGGGTCTTGC     | GGGTGTGGGATGCACTTATC   |
| <i>jag2</i>                   | GTCGTCATCCCCTTCCAGT      | GGTGGTATCGTTGTCCCAGT   |
| <i>dll1</i>                   | GAGCGTGGGGAGAAAGTGT      | ATGCTGCTCATCACATCCAG   |
| <i>dll4</i>                   | GCACTCCCTGGCAATGTACT     | GGAGTGGTGGGTGCAGTAGT   |

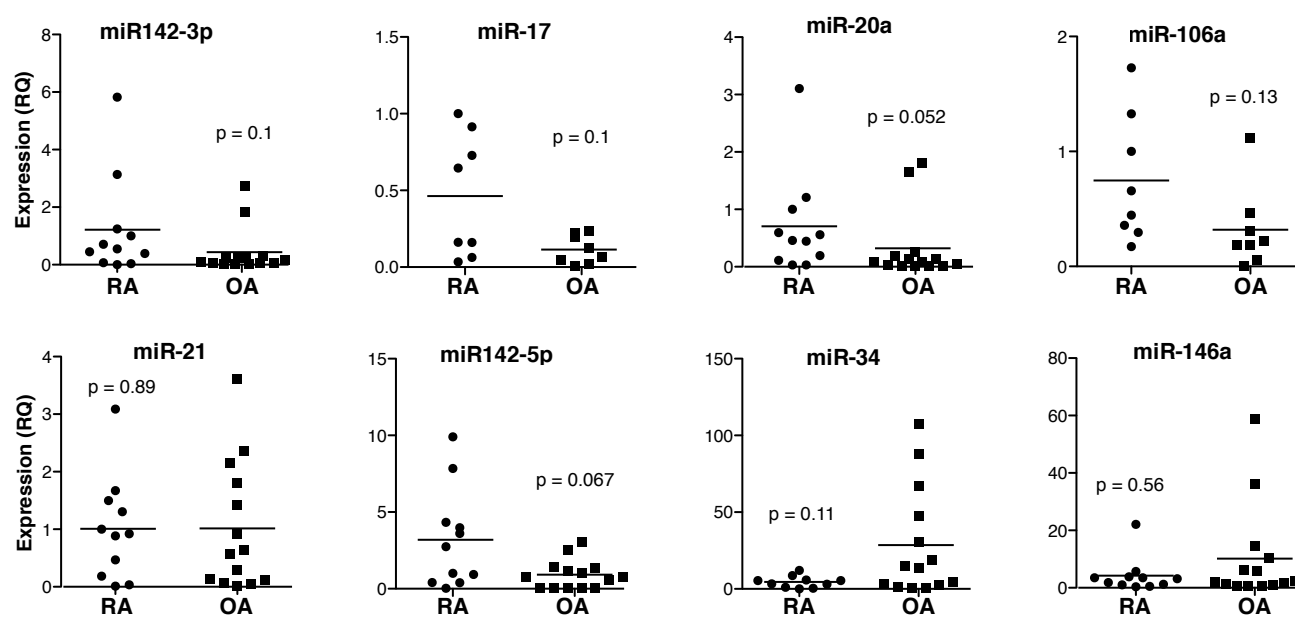

**Figure S1. Non-validated miR expressed in RA and OA patient macrophages.** Relative levels of the indicated miR were determined by RT-qPCR in macrophages isolated from RA (n = 11) and OA (n = 14) patients. Values are indicated as relative quantification (RQ), using the sample with the lowest  $2^{-\Delta\Delta C_t}$  value (RQ = 1) as reference. Probability values were calculated using the Mann-Whitney U-test.

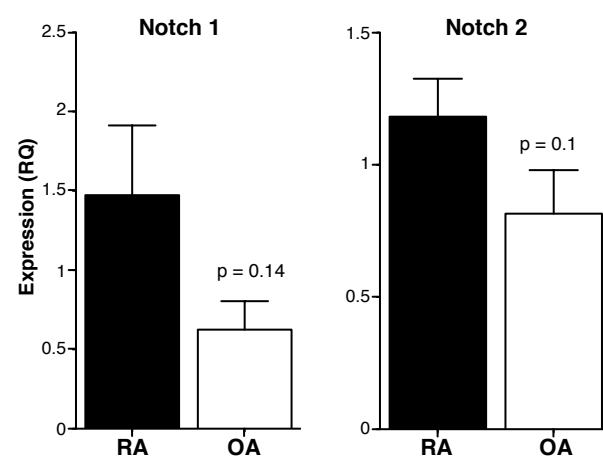

**Figure S2. Notch1 and Notch2 are not differentially expressed in RA and OA macrophages.** Relative levels of Notch1 and Notch2 mRNA in macrophages from RA (n = 4) and OA (n = 6) patients, as determined by RT-qPCR. Data shown as mean  $\pm$  SEM; p values were calculated using the Mann-Whitney U-test.

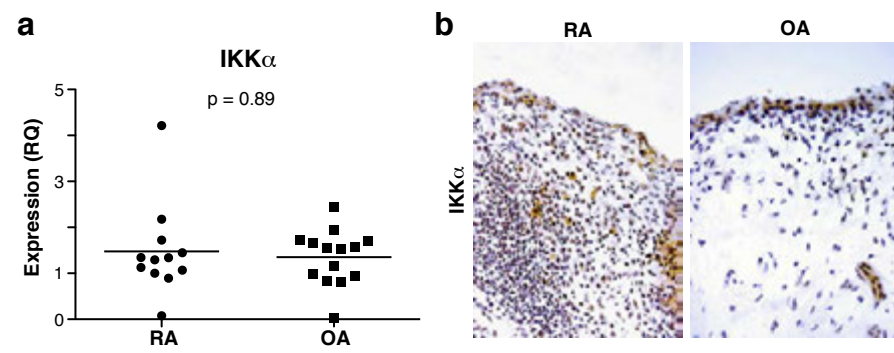

**Figure S3. IKK $\alpha$  is not differentially expressed in RA and OA macrophages.** (a) Relative IKK $\alpha$  mRNA levels in macrophages from RA (n = 12) and OA (n = 14) patients; Mann-Whitney U-test. (b) IKK $\alpha$  staining in RA (n = 13) and OA (n = 8) synovial tissues.

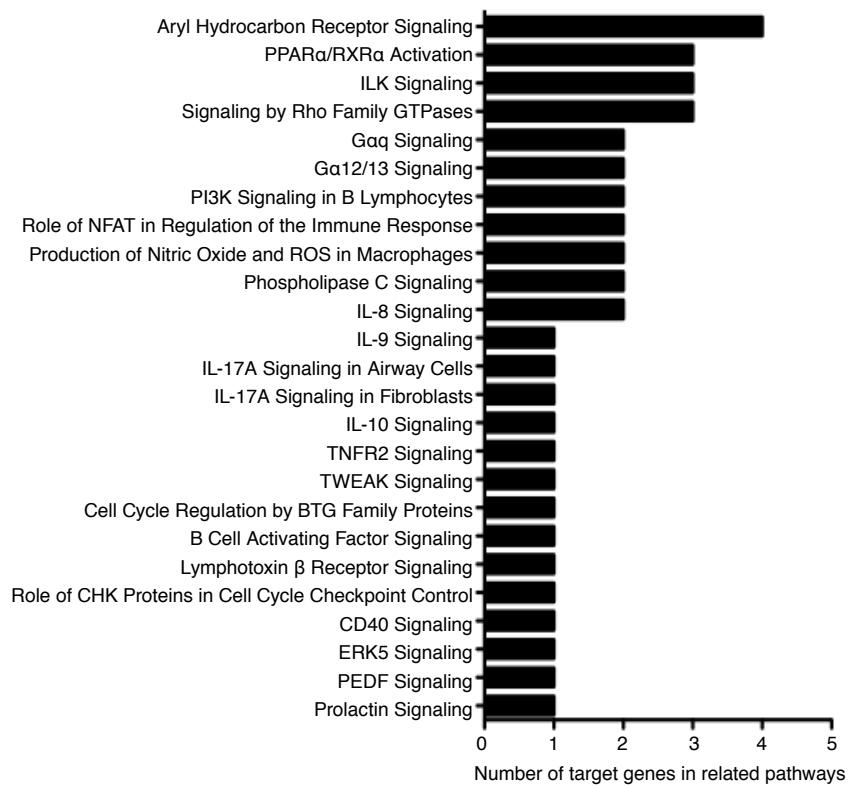

**Figure S4. Ingenuity Pathway Analysis of miR-223 targets identified in silico.** Number of putative miR-223 target genes for each of the signalling pathways identified by IPA.



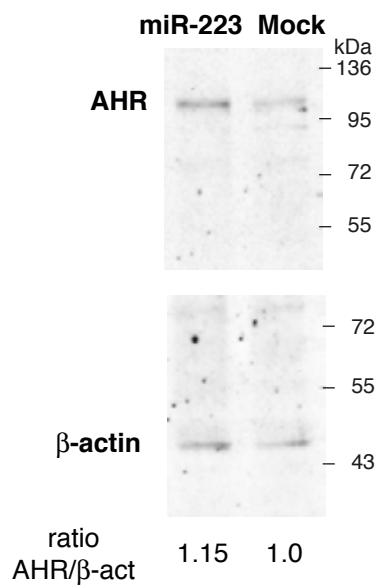

**Figure S5. Forced miR-223 expression does not affect AHR protein levels.** Immunoblot analysis of extracts of HEK-293 cells expressing control or pre-miR-223, probed with anti-AHR and - $\beta$ -actin antibodies. Bands were densitometred in Image J and the AHR/ $\beta$ -actin calculated; ratio in mock-transfected cells is equal to 1. Results are representative of two independent experiments

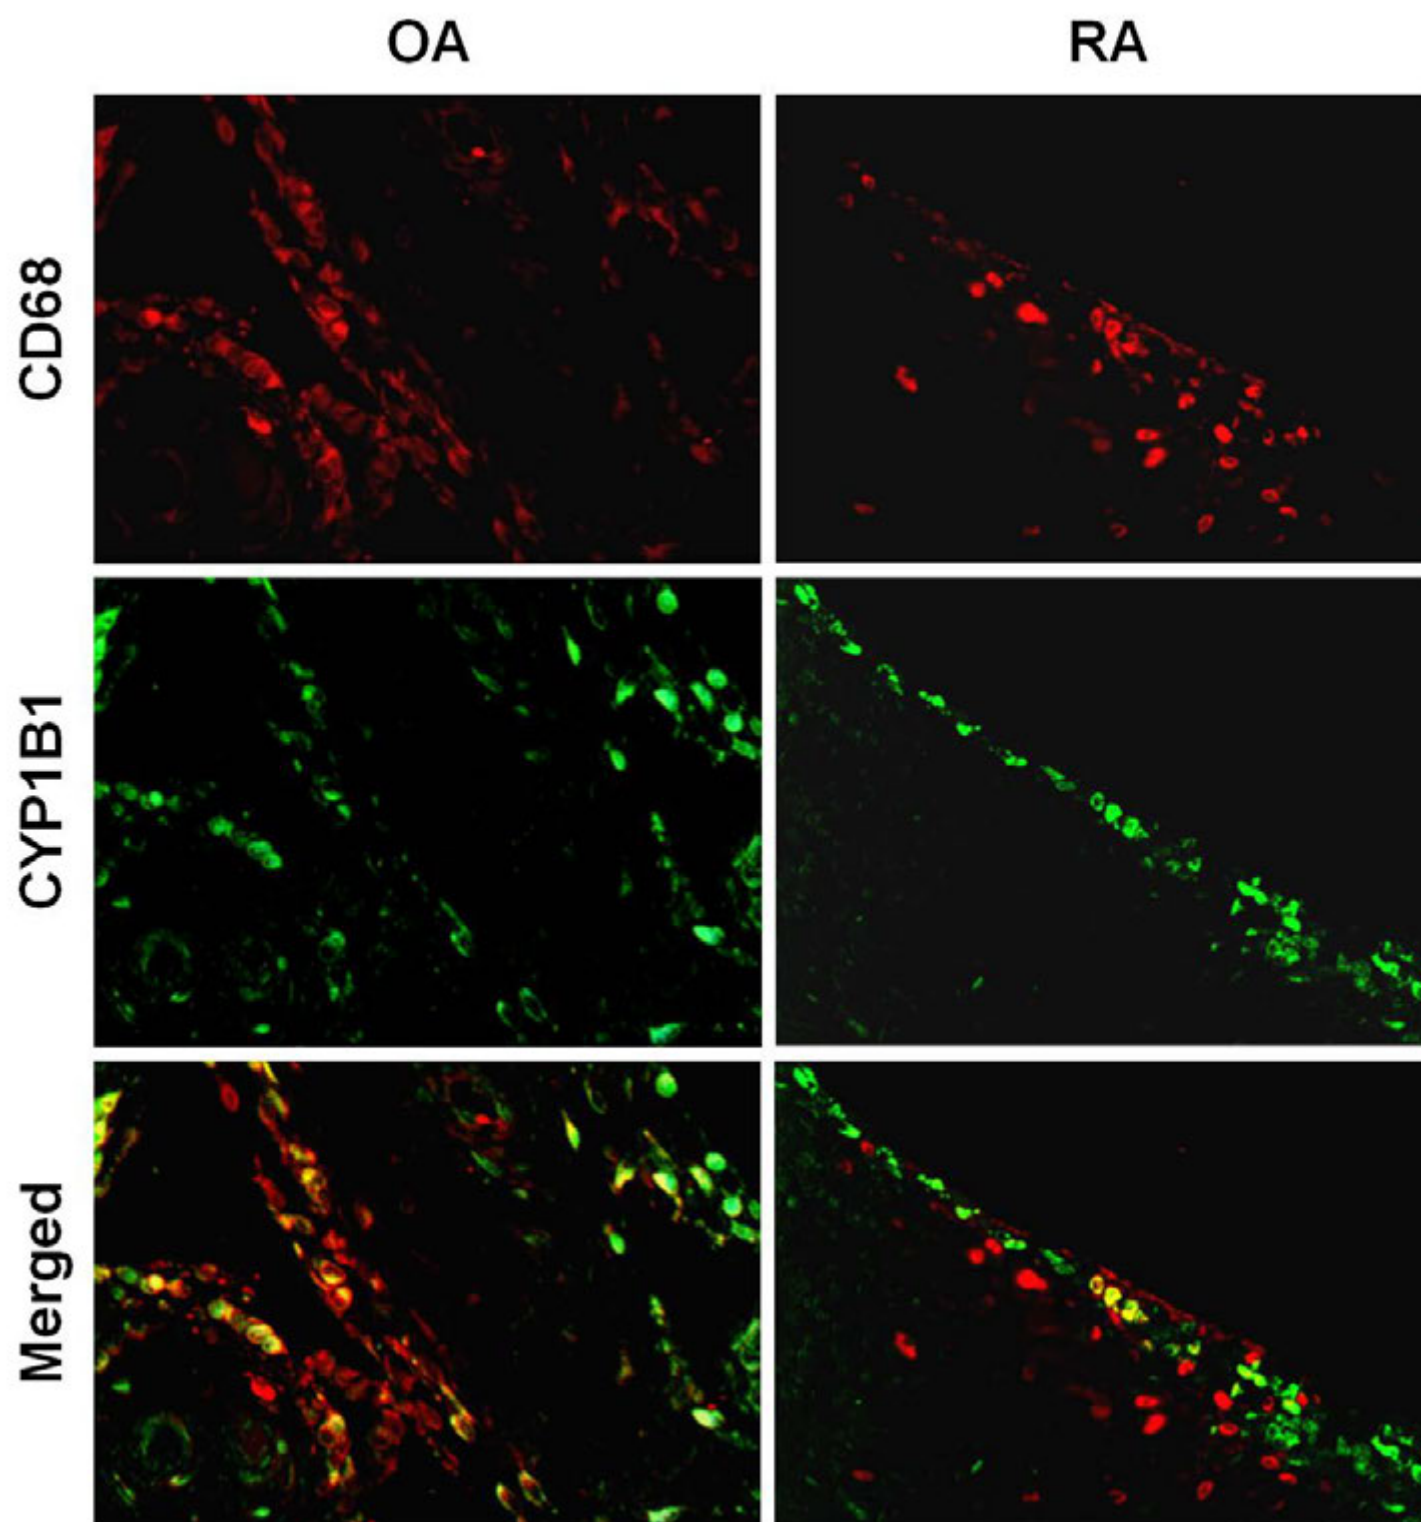

**Figure S6. AHR target gene expression in synovial macrophages.** Tissue sections from OA and RA patients were double-stained for CYP1B1 (green) and the macrophage marker CD68 (red); merge of both channels (yellow). Images representative of 5 synovial tissues per condition.

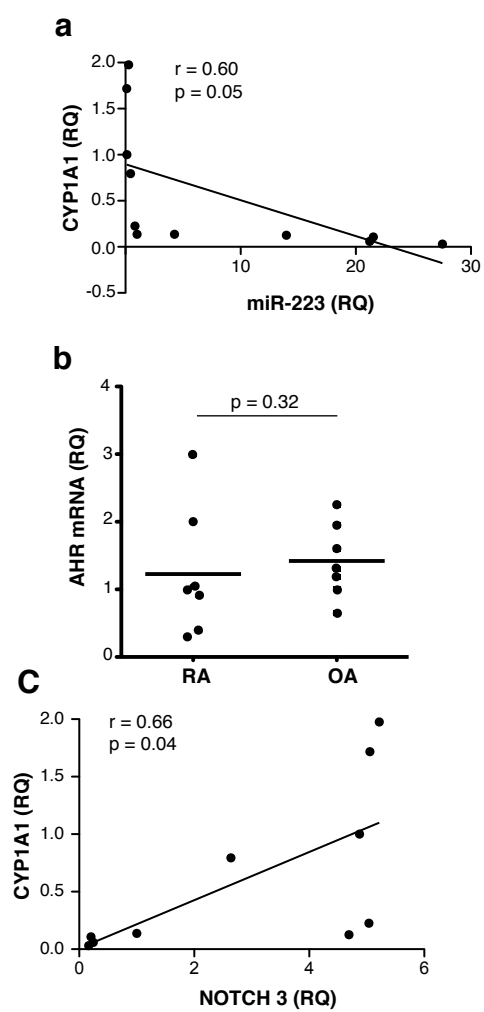

**Figure S7. Correlation between CYP1A1, miR-223 and Notch3 levels.** (a) Linear regression analysis of CYP1B1 mRNA and miR-223 levels in RA and OA samples ( $n = 11$ ). (b) AHR mRNA levels in OA and RA patient samples, as determined by RT-qPCR. (c) Linear regression analysis of CYP1B1 and Notch3 mRNA levels in RA and OA samples ( $n = 10$ ).
